# Supplementary material for: Spatializing Net Ecosystem Exchange in the Brazilian Amazon biome using the JULES model and vegetation properties
Source: Copernicus journal article supplement (doi:10.5194/egusphere-2025-2869), 2025-07-02
Supplement: Supplementary file 1 [file egusphere-2025-2869-supplement.pdf]

## Supplementary material

### S.1 Model description

5 To calculate GPP and Respiration, JULES uses several equations based on the limitation factor of three potential photosynthesis rates (Collatz et al., 1991, 1992): Light limitation rate ( $W_l$ ); Rubisco limited rate ( $W_c$ ); and Transport of photosynthetic products for C3 and PEP Carboxylase limitation for C4 plants ( $W_e$ ). One important aspect of calculating  $W_e$  and  $W_c$  is the dependence on the maximum rate of carboxylation of Rubisco ( $V_{cmax}$ ) at 25° C. To calculate  $V_{cmax}$  for any temperature, an optimal temperature range is required for each plant functional type ( $T_{upp}$  and  $T_{low}$ ), as described by Clark et al., (2011) (Equation 1):

$$Vc\ max = \frac{Vcmax,25ft(Tc)}{[1+e^{0.3(Tc-T_{upp})}][1+e^{0.3(T_{low}-Tc)}]} \quad (1)$$

where  $T_c$  is the canopy (leaf) temperature in Celsius degrees and  $ft$  is the standard  $Q_{10}$  temperature dependence (Equation 2):

$$ft(Tc) = Q_{10,leaf}^{0.1(Tc-25)} \quad (2)$$

15 where  $Q_{10, leaf}$  is 2.0.

JULES calculates  $V_{cmax}$  in 25°C based on leaf nitrogen content ( $kg\ N\ kg\ C^{-1}$ ) in each canopy layer ( $i$ ) (Equation 3):

$$Vcmax,25,i = n_{eff}N_{10}e^{-kn(i-1)/10} \quad (3)$$

being,  $kn$  the extinction coefficient ( $kn = 0.78$ , based on Mercado et al., 2007);  $N_{10}$  is the top leaf nitrogen content ( $kg\ N\ kg\ C^{-1}$ ) considering a 10-layer canopy and  $n_{eff}$  linearly relates to the concentration of N in leaves to  $V_{cmax, 25}$ .

20 Considering the  $V_{cmax}$  JULES can calculate the three potentially-limiting rates:

1-Rubisco-limited rate ( $W_c$ ) (Equation 4)

$$W_c = \left\{ \begin{array}{l} Vcmax \left( \frac{ci-\Gamma}{ci+kc \left( 1+\frac{Oa}{ko} \right)} \right) for C3 plants \\ Vc\ max\ for C4 plants \end{array} \right\} \quad (4)$$

where  $V_{\text{cmax}}$  (mol CO<sub>2</sub> m<sup>-2</sup> s<sup>-1</sup>) is the maximum rate carboxylation of Rubisco,  $c_i$  is the leaf internal carbon dioxide partial pressure (Pa),  $\Gamma$  is the CO<sub>2</sub> compensation point in the absence of mitochondrial respiration (Pa),  $O_a$  is the partial pressure of atmospheric oxygen, and  $K_c$  and  $K_o$  are the Michaelis-Menten parameters for CO<sub>2</sub> and O<sub>2</sub>, respectively.

2- Light-limited rate ( $W_l$ ) (Equation 5)

$$W_l = \begin{cases} \alpha(1 - \omega)I_{\text{par}} \left( \frac{c_i - \Gamma}{c_i + 2\Gamma} \right) & \text{for C3 plants} \\ \alpha(1 - \omega)I_{\text{par}} & \text{for C4 plants} \end{cases} \quad (5)$$

where  $\omega$  is the leaf scattering coefficient for PAR,  $I_{\text{par}}$  is the incident photosynthetically active radiation (PAR, mol m<sup>-2</sup> s<sup>-1</sup>) and  $\alpha$  is the quantum efficiency for photosynthesis (mol CO<sub>2</sub> mol<sup>-1</sup> PAR).

3- Rate of transport of photosynthetic products (in the case of C<sub>3</sub> plants) and PEP Carboxylase limitation (in the case of C<sub>4</sub> plants) ( $W_e$ ) (Equation 6):

$$W_e = \begin{cases} 0.5V_{\text{cmax}} & \text{for C3 plants} \\ 2 \times 10^4 V_{\text{cmax}} \frac{c_i}{P^*} & \text{for C4 plants} \end{cases} \quad (6)$$

where  $P^*$  is the surface air pressure.

The three potentially-limiting rates are essential to calculating the rate of gross photosynthesis ( $W$ ) being the smoothed minimum of the three limited rates previously calculated (Equation 7):

$$\begin{cases} \beta_1 W_p^2 - W_p(W_c + W_l) + W_c W_l = 0 \\ \beta_2 W^2 - W(W_p + W_e) + W_p W_e = 0 \end{cases} \quad (7)$$

where  $\beta_1$  and  $\beta_2$  are co-limitation coefficients (0.83 and 0.9, respectively) and  $W_p$  is the smoothed minimum of  $W_c$  and  $W_l$ . The smaller root of each quadratic is selected.

The first step in calculating respiration is to define leaf dark respiration ( $R_d$ ).  $R_d$  is based on a proportional of  $V_{\text{cmax}}$ . (Equation 8)

$$Rd = f_d V_{cmax} \quad (8)$$

45 being  $f_d$  as the dark respiration coefficient.

After defining the leaf dark respiration, JULES can estimate the leaf photosynthesis ( $Al$ ) based on the difference between gross photosynthesis rate and  $Rd$  and a soil moisture stress factor based on Cox et al., 1998 ( $\beta$ ) (Equation 9) in which that can represent how the photosynthesis rate falls due the hydric stress (Equation 10):

$$Al = (W - Rd)\beta \quad (9)$$

$$\beta = \begin{cases} 1 & \text{for } \theta > \theta_c \\ \frac{\theta - \theta_w}{\theta_c - \theta_w} & \text{for } \theta_w < \theta \leq \theta_c \\ 0 & \text{for } \theta \leq \theta_w \end{cases} \quad (10)$$

being,  $\theta$  the actual soil moisture;  $\theta_c$  is the soil moisture at the field capacity;  $\theta_w$  is the soil moisture at the wilting point.

Leaf photosynthesis is also important to define the stomatal conductance ( $gs$ ), based on the approach of Jacobs (1984) which identified that the difference between internal and external  $CO_2$  concentration in a leaf level can explain the stomatal open and closure (Equation 11):

$$Al = \frac{gs(C_s - C_i)}{1.6} \quad (11)$$

where  $C_s$  is the leaf surface  $CO_2$  concentration and  $C_i$  is the leaf internal  $CO_2$  concentration.

The leaf  $CO_2$  concentration on the surface or internal is defined based on the leaf humidity deficit estimated by the vapor deficit in the leaf surface ( $D$ ) and in two parameters related to specific plant function types ( $f_0$  and  $D_{crit}$ ) (Equation 12):

$$\frac{C_i - \Gamma}{C_s - \Gamma} = f_0 \left( 1 - \frac{D}{D_{crit}} \right) \quad (12)$$

60 To calculate the total plant respiration, JULES considers the sum of two procedures: Growth and maintenance respiration ( $R_{pm}$  and  $R_{pg}$ , respectively, Equation 13 and 14, respectively)

$$R_{pm} = 0.012 R_d \left( \beta + \frac{N_r + N_s}{N_l} \right) \quad (13)$$

and

65

$$R_{pg} = r_g(GPP - R_{pm}) \tag{14}$$

where  $N_l$ ,  $N_s$  and  $N_r$  are nitrogen contents of leaf, stem and root, respectively, as described by Clark et al., (2011).  $R_g$  is the growth respiration coefficient set for 0.25 for all plant functional types (Clark et al., 2011 and Harper et al., 2016). GPP is based on the integration of AI taking into account every leaf level adopted by Harper et al., (2016) in each used multi-layer canopy with sunlit and shaded leaves in each layer.

70

The net ecosystem exchange (NEE) is calculated by JULES as the difference between GPP and total ecosystem respiration (plant and soil respiration,  $R_{eco}$ , Equation 15):

$$NEE = R_{eco} - GPP \tag{15}$$

75

**S.2. Sensitivity analysis**

**Table S2.1: JULES parameters selected for sensitivity analysis in the Amazon region based on Li et al., (2016) for broadleaf tree forest. Maximum and minimum values for each parameter were based in the literature**

| Parameters | Description                                                                | minimum value | maximum value |
|------------|----------------------------------------------------------------------------|---------------|---------------|
| alnir      | Leaf reflection coefficient for NIR.                                       | 0.225         | 0.675         |
| alpar      | Leaf reflection coefficient for VIS (photosynthetically active radiation). | 0.05          | 0.15          |
| alpha      | Quantum efficiency (mol/mol).                                              | 0.04          | 0.12          |
| canht_ft   | Canopy height (m).                                                         | 19            | 50            |
| catch0     | Minimum canopy water capacity (kg/m <sup>2</sup> ).                        | 0.25          | 0.75          |

|             |                                                                                                |          |          |
|-------------|------------------------------------------------------------------------------------------------|----------|----------|
| dcatch_dlai | Rate of change of canopy water capacity with LAI (kg/m <sup>2</sup> ).                         | 0        | 0.2      |
| dgl_dt      | Rate of change of leaf turnover rate with temperature (K <sup>-1</sup> ).                      | 4.5      | 13.5     |
| dqcrit      | Critical humidity deficit (kg/kg).                                                             | 0.045    | 0.135    |
| dz0v_dh     | Rate of change of vegetation roughness length for momentum with height.                        | 0.01     | 0.15     |
| f0          | Values of the maximum ratio of internal to external CO <sub>2</sub> .                          | 0.7      | 0.95     |
| Fd          | Scale factor for dark respiration.                                                             | 0.005    | 0.025    |
| g_leaf_0    | Minimum turnover rate for leaves.                                                              | 0.125    | 0.375    |
| glmin       | Minimum leaf conductance for H <sub>2</sub> O (mmol/m <sup>2</sup> /s).                        | 5.00E-07 | 1.50E-06 |
| kext        | Light extinction coefficient- used with Beer's Law for light absorption through tile canopies. | 0.25     | 0.75     |
| kpar        | PAR Extinction coefficient (m <sup>2</sup> /m <sup>2</sup> ).                                  | 0.25     | 0.75     |
| nl0         | Top leaf nitrogen concentration (kg N/kg C).                                                   | 0.023    | 0.069    |
| r_grow      | Growth respiration fraction.                                                                   | 0.125    | 0.375    |
| rootd_ft    | Root depth (m).                                                                                | 0.5      | 6        |
| tleaf_of    | Temperature below which leaves are dropped (K).                                                | 273.15   | 283.15   |
| tlow        | Lower temperature threshold for photosynthesis (°C).                                           | -5       | 15       |
| tupp        | Upper temperature threshold for photosynthesis (°C).                                           | 20       | 50       |

**Table S2.2: Relevance level of JULES parameters in the ATTO tower representing the Brazilian Amazon biome. The most sensitive parameters, highlighted in bold, were chosen based on the shared relevance in NEE simulations.**

| parameter          | MDA (g C m <sup>-2</sup> day <sup>-1</sup> ) | parameter       | var(%)        |
|--------------------|----------------------------------------------|-----------------|---------------|
| <b>canht_ft_io</b> | <b>16.5781</b>                               | <b>canht_ft</b> | <b>193.38</b> |
| <b>fd</b>          | <b>12.3263</b>                               | <b>fd</b>       | <b>141.81</b> |
| <b>alpha</b>       | <b>4.1886</b>                                | <b>alpha</b>    | <b>45.06</b>  |
| <b>tupp</b>        | <b>2.0199</b>                                | <b>f0</b>       | <b>15.93</b>  |
| <b>f0</b>          | <b>1.6988</b>                                | <b>tupp</b>     | <b>13.24</b>  |
| dqcrit             | 0.8584                                       | dqcrit          | 11.61         |
| r_grow             | 0.7734                                       | r_grow          | 5.79          |
| dz0 max            | 0.4571                                       | dz0v_dh         | 5.00          |
| root               | 0.3521                                       | root            | 4.66          |
| tlow               | 0.1391                                       | tlow            | 1.90          |
| alpar              | 0.0896                                       | dcatch          | 1.00          |
| dcatch             | 0.0788                                       | alpar           | 0.88          |
| catch0             | 0.0238                                       | catch0          | 0.32          |
| kext               | 0.0046                                       | kext            | 0.08          |
| glmin              | 0.0007                                       | glmin           | 0.02          |
| alnir              | 0.0000                                       | alnir           | 0.00          |
| dgl_dt             | 0.0000                                       | dgl_dt          | 0.00          |
| kpar               | 0.0000                                       | kpar            | 0.00          |
| n10                | 0.0000                                       | n10             | 0.00          |
| tleaf              | 0.0000                                       | tleaf           | 0.00          |
| gleaf              | 0.0000                                       | g_leaf          | 0.00          |

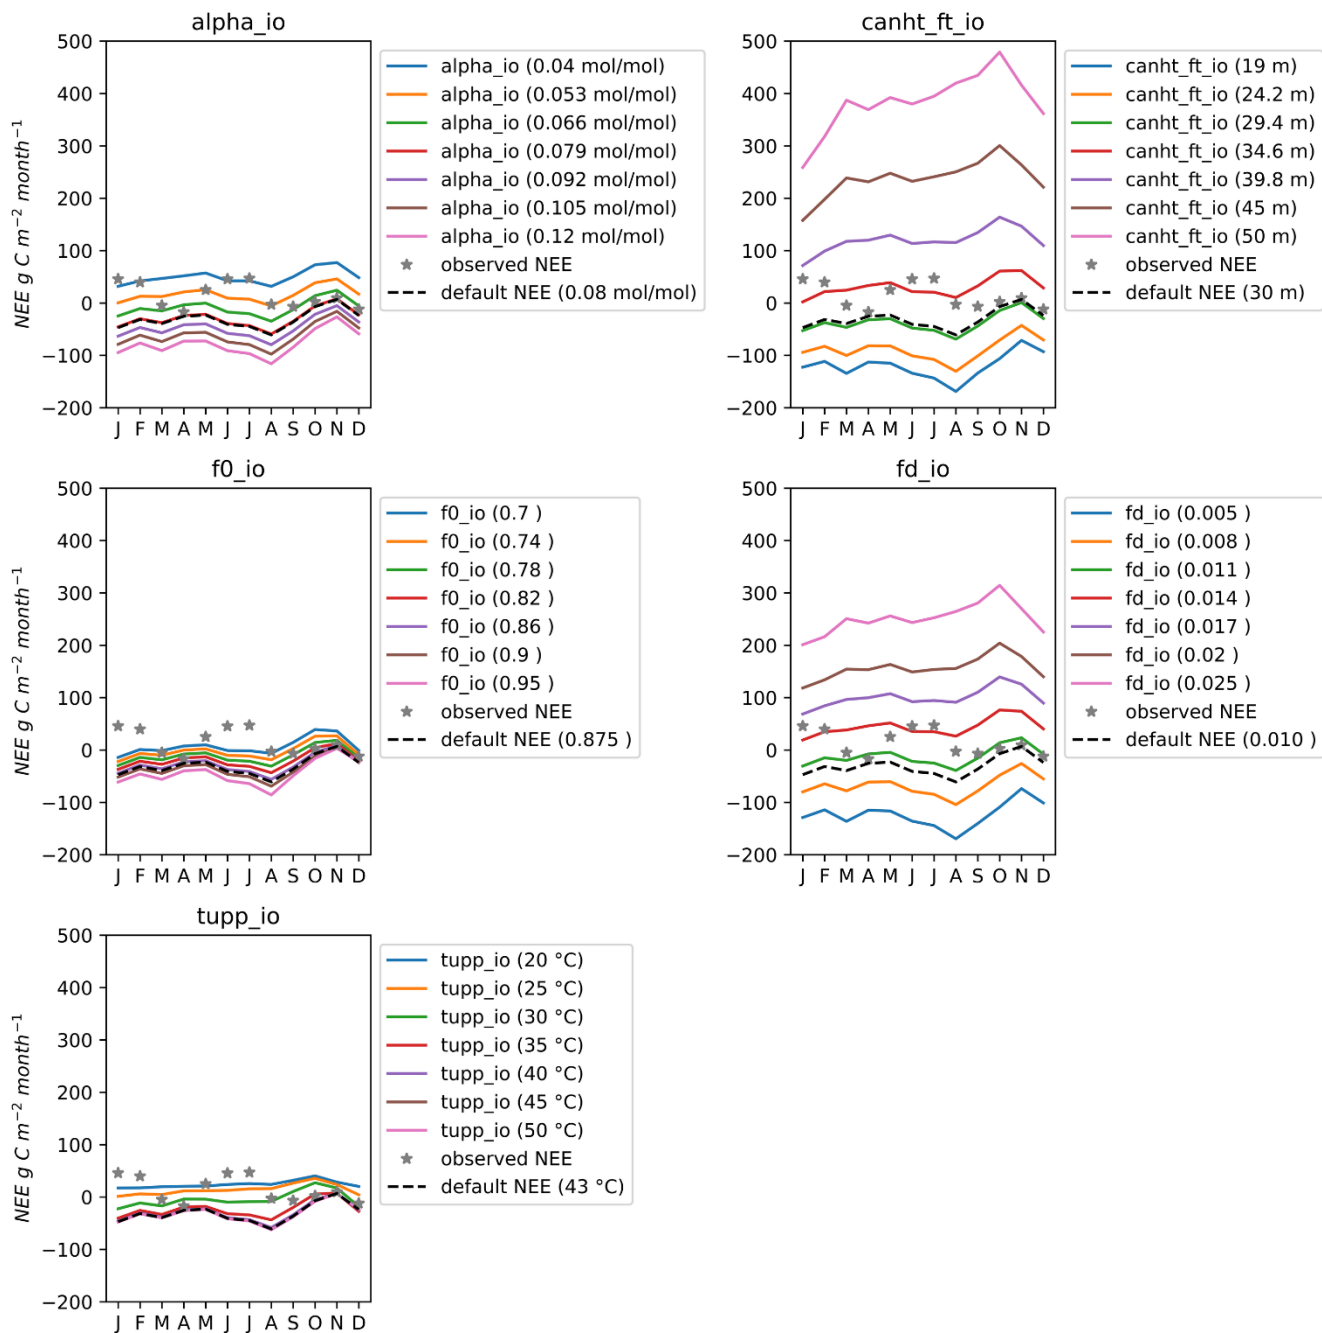

**Figure S2: Sensitivity analysis of main parameters of JULES for NEE variable in ATTO tower representing the Brazilian Amazon biome during the year of 2018.**

90 **S.3 Spatialization of JULES parameters**

**S.3.1. Mapbiomas database adaptation for JULES**

**Table S3.1.1: Mapbiomas classes of vegetation and the respective land functional type from JULES applied to spatialize the Brazilian Amazon biome and land functional type (LFT) available in JULES model.**

95

| Mapbiomas                      | JULES- LFT | Description                          |
|--------------------------------|------------|--------------------------------------|
| Forest Formation               | BET-TR     | Broadleaf Evergreen tress - tropical |
| Savannah Formation             | ESH        | Evergreen schrubs                    |
| Mangrove                       | BET-TR     | Broadleaf Evergreen tress - tropical |
| Floodable Forest               | BET-TR     | Broadleaf Evergreen tress - tropical |
| Wooded Sandbank Vegetation     | ESH        | Evergreen schrubs                    |
| Grassland-Savannah             | ESH        | Evergreen schrubs                    |
| Hypersaline Tidal Flat         | ESH        | Evergreen schrubs                    |
| Herbaceous Sandbank Vegetation | ESH        | Evergreen schrubs                    |
| Pasture                        | C4         | C4 grass                             |
| Soybean                        | C3         | C3 grass and crops                   |
| Sugarcane                      | C4         | C4 grass                             |
| Rice                           | C3         | C3 grass and crops                   |
| Cooton                         | C3         | C3 grass and crops                   |
| Perenial crop                  | ESH        | Evergreen schrubs                    |

| Forest Plantation           | BDT       | Broadleaf Decidious Trees |
|-----------------------------|-----------|---------------------------|
| Beaches, dune and sand spot | Bare soil | Bare soil                 |
| Urban Area                  | Urban     | Urban                     |
| Mining                      | Bare soil | Bare soil                 |
| River, Lake and Ocean       | Water     | Water                     |
| Aquaculture                 | Water     | Water                     |
| Not observed                | Bare soil | Bare soil                 |

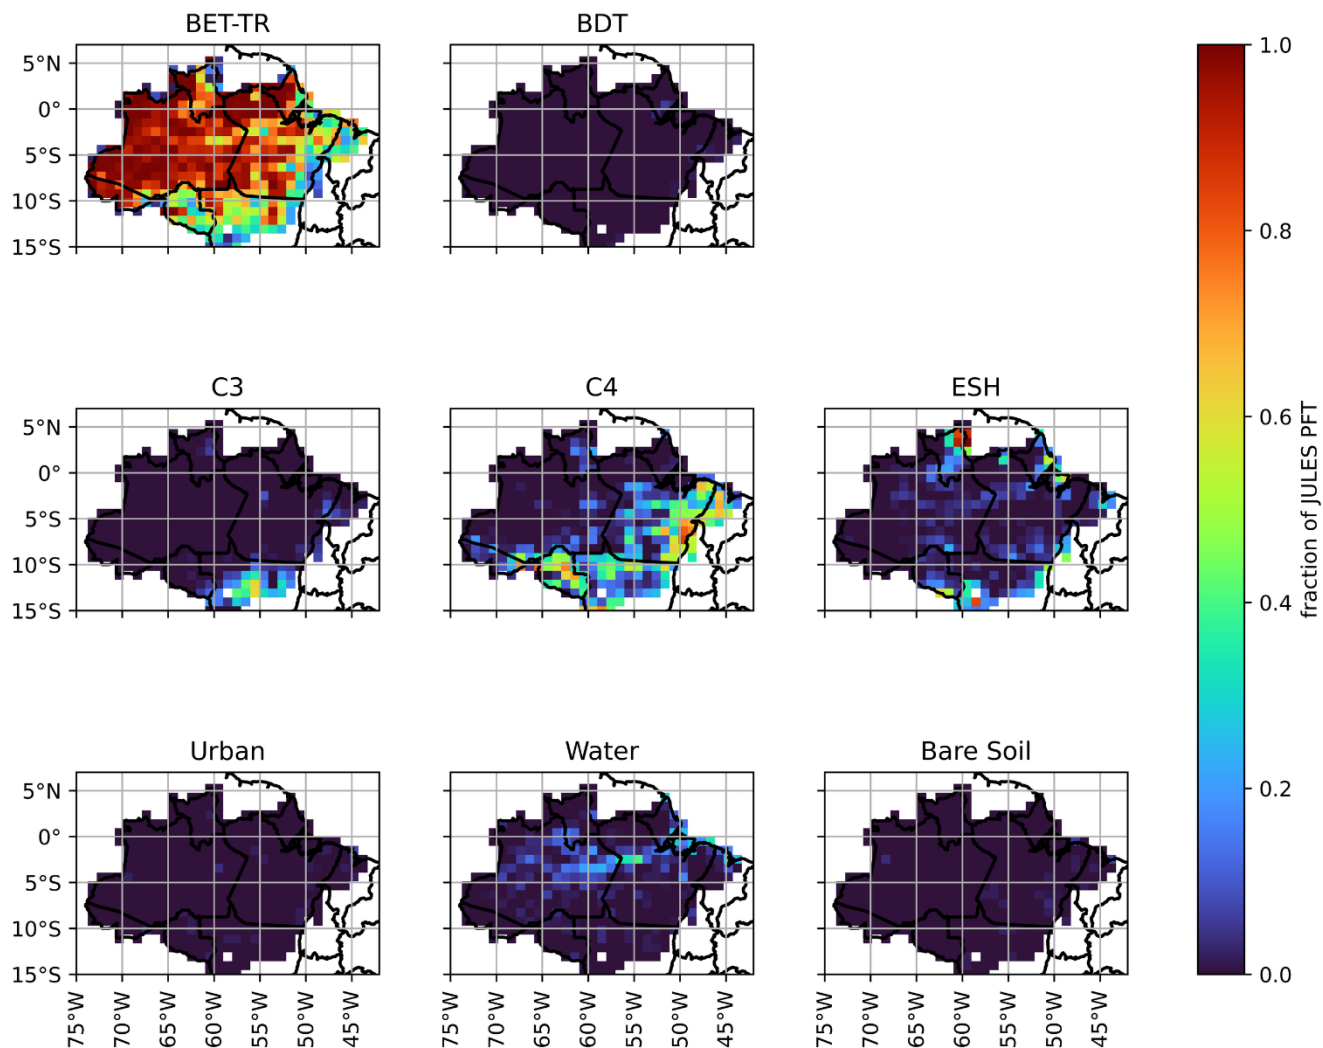

100 **Figure S3.1.1: Distribution of each JULES plant and non-plant functional type in the S3.2.1 utilized for spatializing the carbon flux simulations.**

### S.3.2. Tupp, upper temperature threshold for photosynthesis

105

Two linear regression models were tested for the parameter Tupp, having the canopy height of the LAI as predictors. Tupp showed a directly proportional relationship with LAI and an inversely proportional relationship with the canopy height (Figure S3.2.1). Physically, it makes sense to have an inverse relationship between Tupp and canopy height, since low-canopy plants like C4 typically have higher temperature thresholds for photosynthesis. On the other hand, a positive relationship between Tupp and LAI is not physically consistent, since forest areas with higher LAI are expected to have lower temperature thresholds for photosynthesis Li et al., (2016). Considering the arc of deforestation predominantly occupied by C4 grasses, the utilization of canopy height to spatialize Tupp resulted in higher values distributed in this zone. Obviously, since this is an inverse linear relationship, Tupp regression values were limited to 45°C, otherwise the regression model would deliver unrealistically high values. The 45°C limit was based in Harper et al., (2016) which defined a Tupp of 45°C for C4 grasses based on a field experiment in Tapajos. This is higher than the value used by Osborne et al (2015) for soybean (36°C) and near the Tupp value for Maize (45°C).. In the forest areas, the parameterization of Tupp using canopy height as predictor result in a range of values from 37°C , in regions with high canopy height such as in K67 and RJA towers (36 m and 35 m), to 42°C in ATTO and K34 towers, with a lower canopy height (30 and 27 m, respectively) but a higher LAI (5,46 and 4,79 m<sup>2</sup> m<sup>-2</sup> respectively).

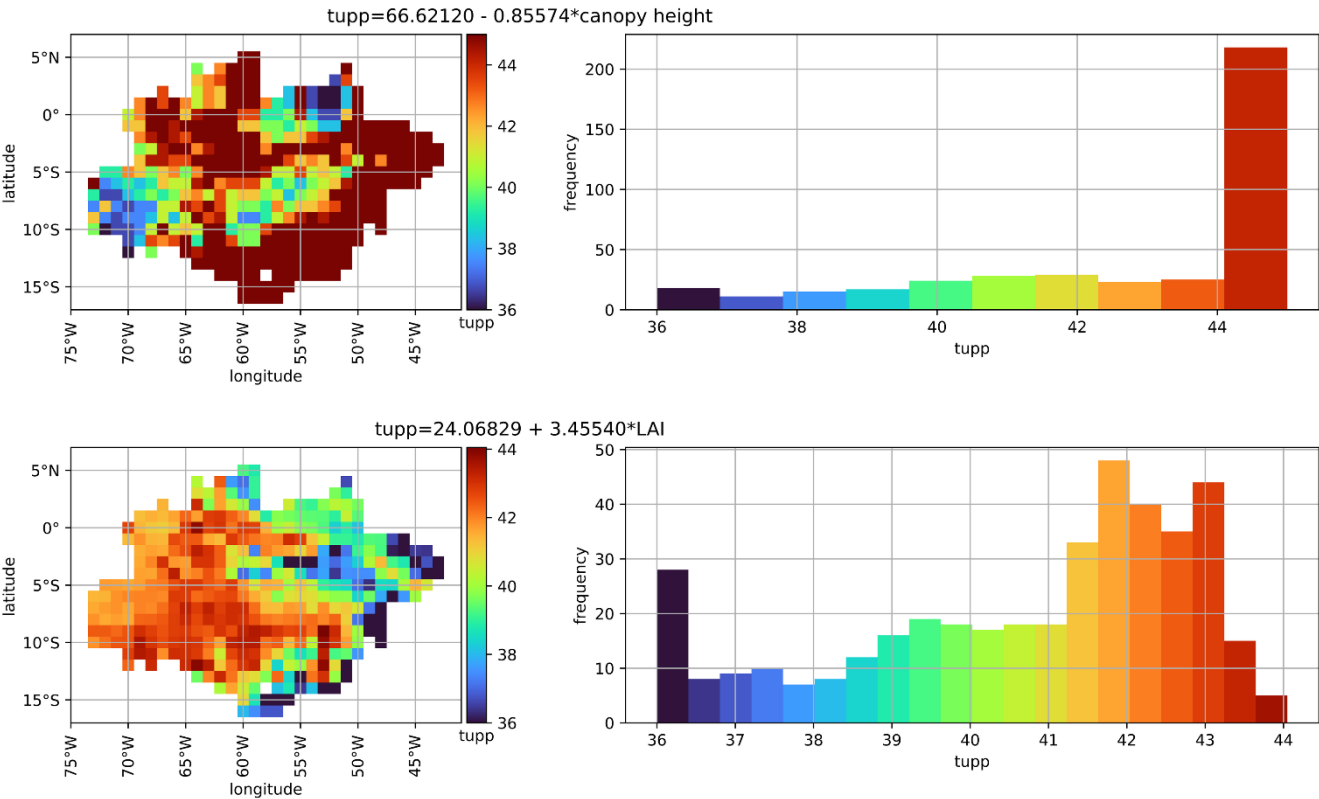

Figure S3.2.1: Tupp spatialized for the Brazilian Amazon biome using two different predictors, canopy height and LAI.

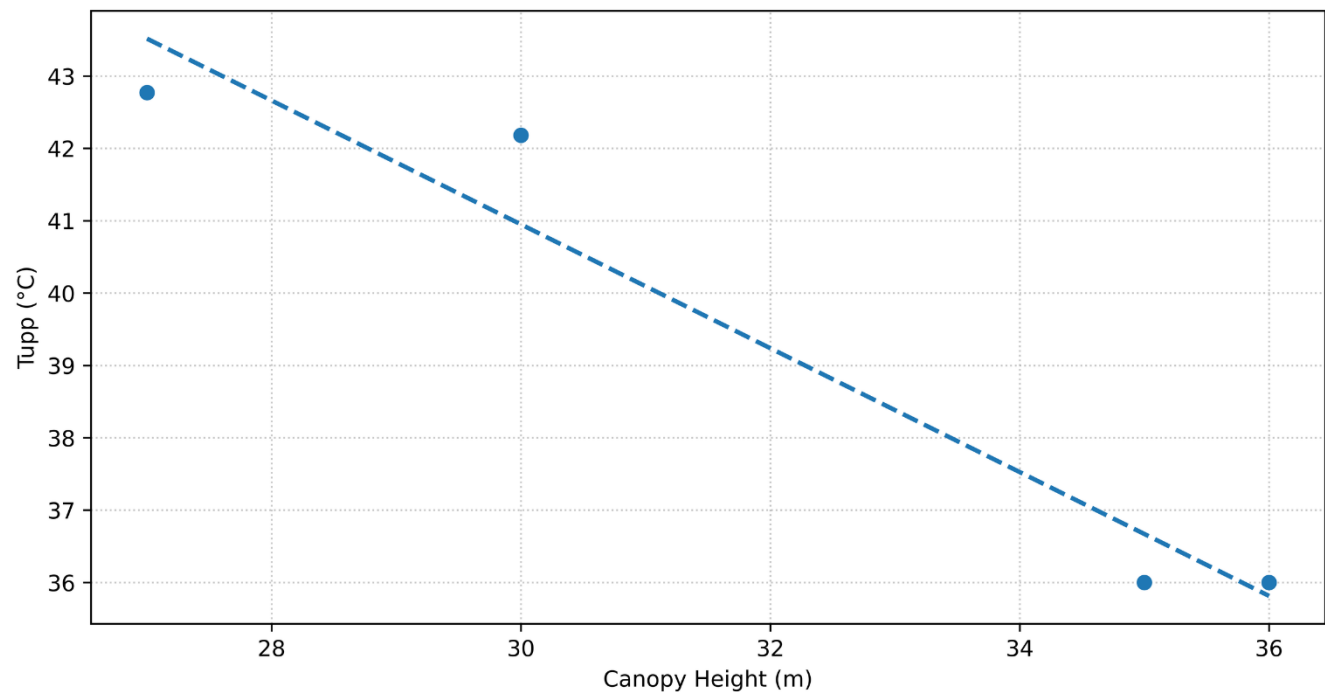

125

Figure S3.2.2: Relationship between Canopy Height and Tupp (°C) for different sites of the Brazilian Amazon biome.

S.3.3. alpha, quantum efficiency

130

Regarding the parameter alpha, the best alternative for spatialization is to use canopy height (Figure S3.3.1), as demonstrated by Harper et al., (2016). Tropical forests are more efficiency in converting PAR into carbon, when compared to C4 plants (Harper et al., 2016). Using the canopy height as predictor, the alpha values for forested regions were in the range 0.05 to 0.06 mol/mol, consistent with Skilmann (2008), who evaluated different species of C3 plants.

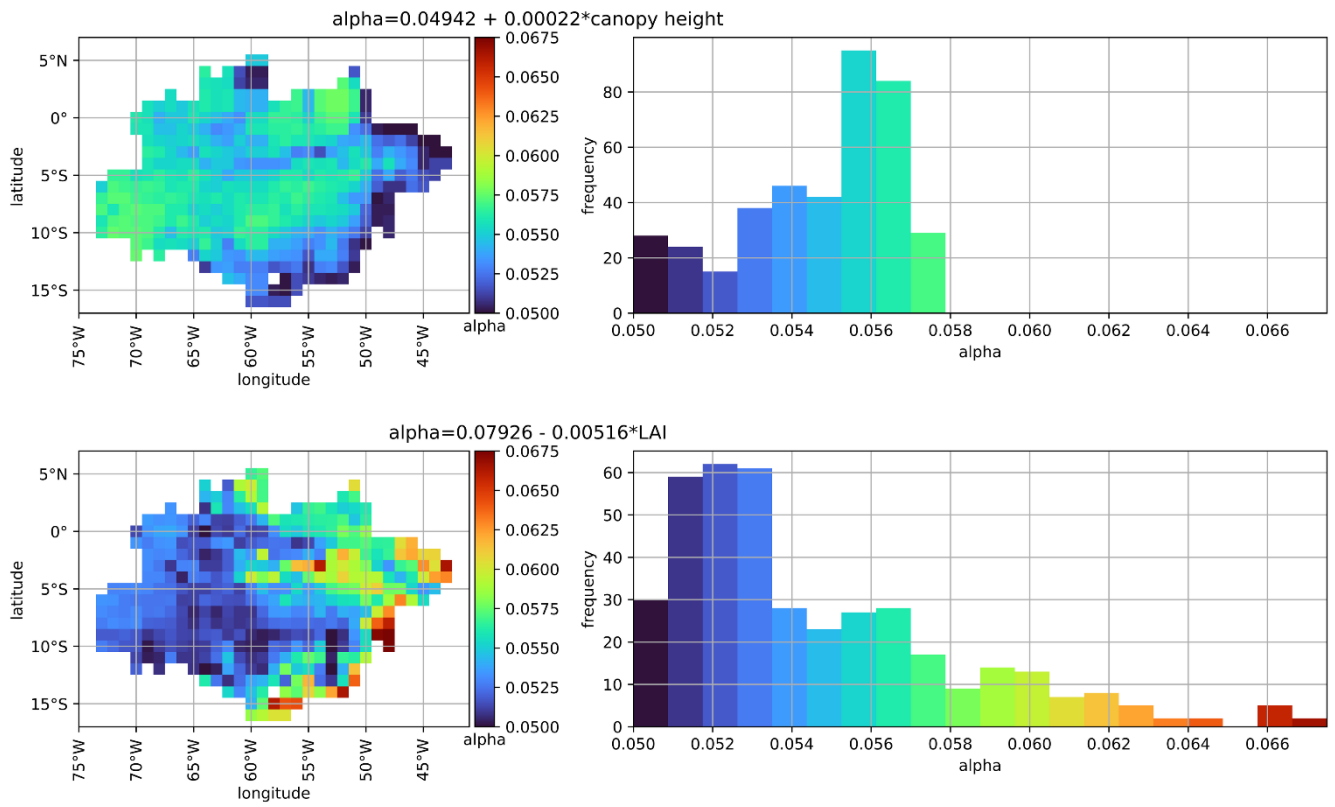

**Figure S3.3.1: Alpha spatialized for the Brazilian Amazon biome using two different methods, with canopy height and LAI.**

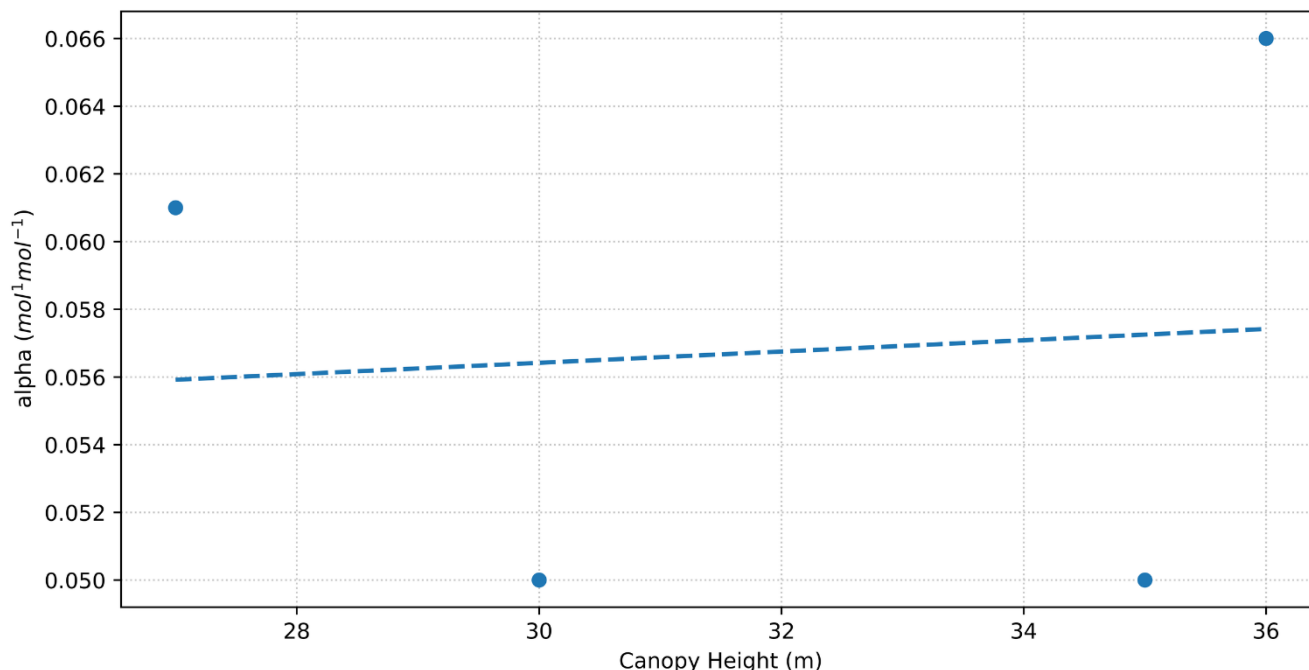

**Figure S3.3.2: Relationship between Canopy Height (m) and alpha (mol¹ mol¹) for different sites of the Brazilian Amazon biome.**

#### S.3.4. f0, maximum ratio of internal to external CO2

The parameter f0 controls the maximum values of leaf-level stomatal conductance. It is a dimensionless quantity ranging from 0 to 1, being associated with water use efficiency. As such, lower f0 values are expected for in plants that are more efficient in water use. Despite canopy height representing better Tupp and alpha spatialized, the best alternative for f0 is to use LAI (Figure S3.4.1). This option using LAI is the only one that can represent the expected reduction of this parameter in the arc of deforestation. C4 plants are more efficient in water use, using less water to produce biomass, due to its metabolism. In a condition of high temperature and radiation, C4 plants reduce the rubisco oxygenase activity and hence the photorespiration (Lambers et al., 2008). In Harper et al., (2016), f0 showed lower values for C4 plants than for tropical forests (0.8 and 0.875, respectively). The same concept can be applied in the center of the forest, in which Santarem and Jaru have species more adaptable to longer dry seasons than in ATTO and Manaus. Accordingly, the parametrization of f0 based on LAI retrieved lower values in Santarem.

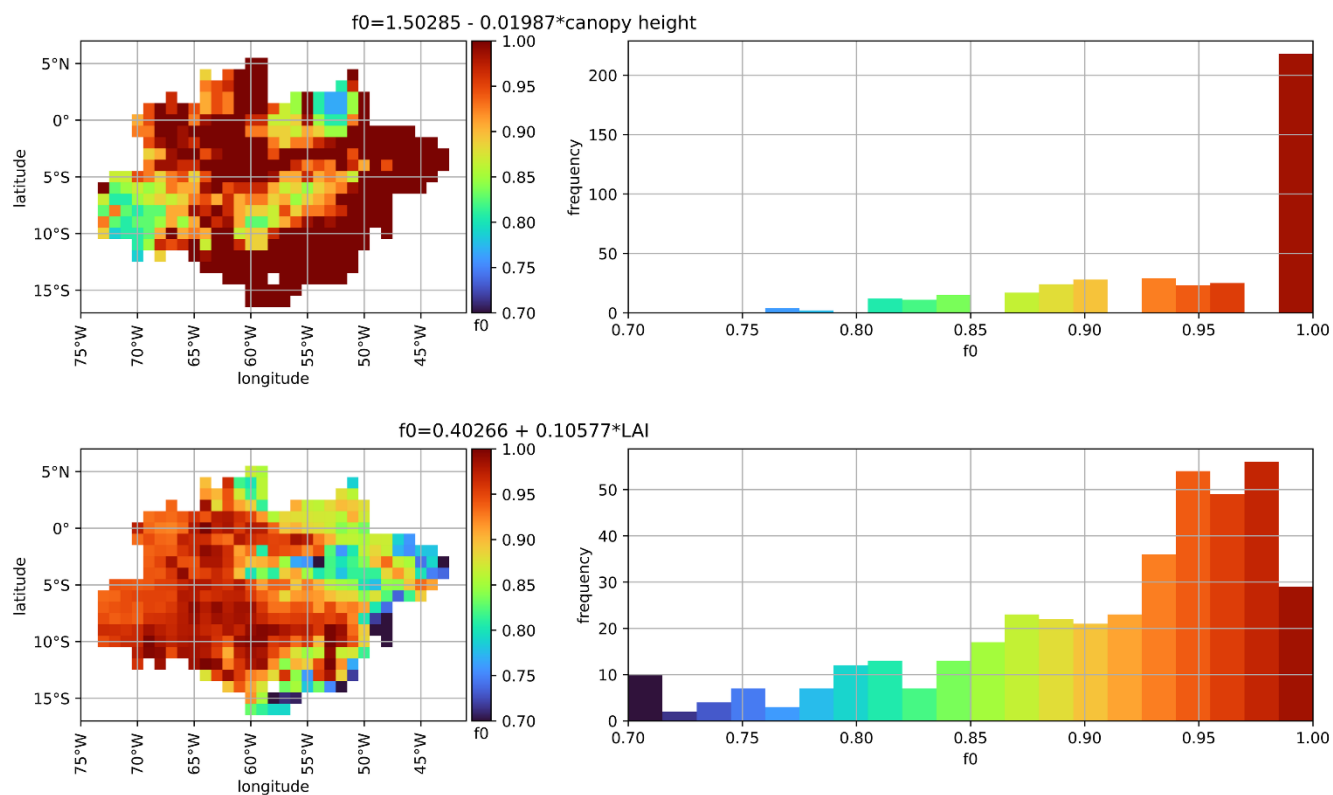

155 **Figure S3.4.1:  $f_0$  spatialized for the Brazilian Amazon biome using two different methods, with canopy height and LAI.**

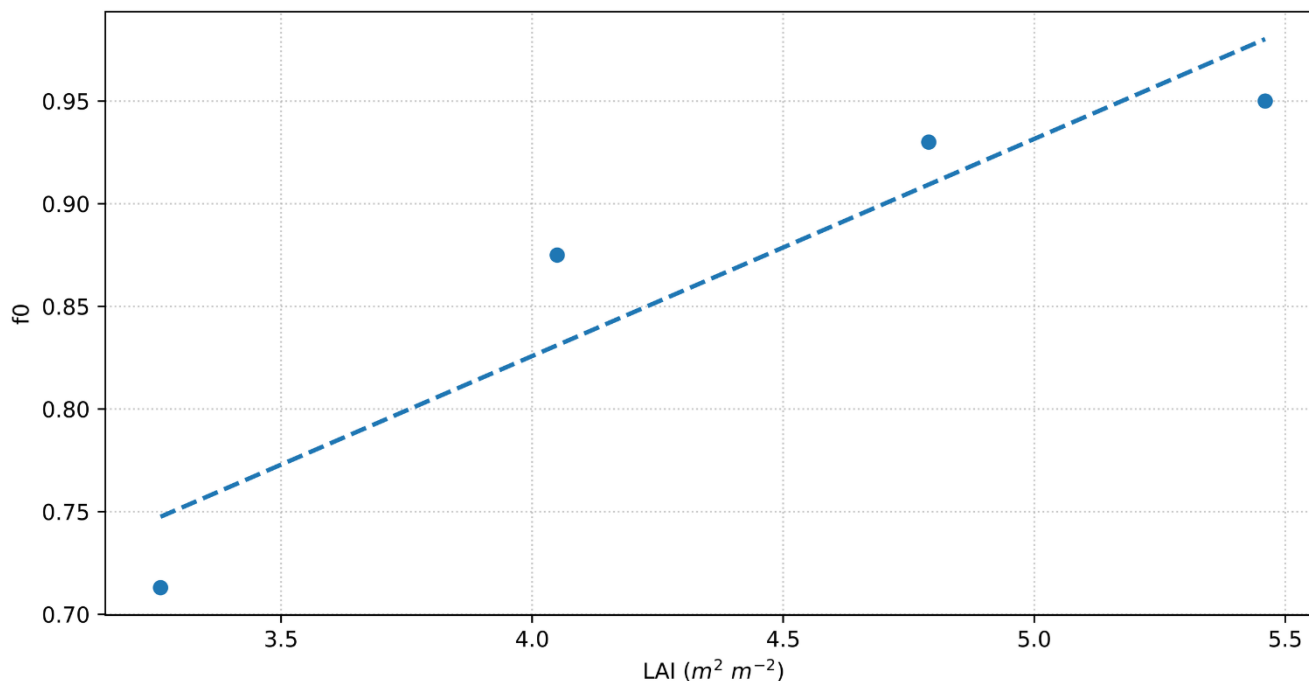

**Figure S3.4.2: Relationship between LAI and  $f_0$  for different sites of the Brazilian Amazon biome.**

### 160 S.3.5. $f_d$ , scale factor for dark respiration

Like  $f_0$ , the parameter  $f_d$  was better represented in the Amazon Basin using LAI (Figure S3.5.1). C4 plants, as the tropical pastures widely used in Brazil such as Marandu (*Urochloa brizantha* cv Marandu), are more efficient in the utilization of water due to the metabolism that increases carbon concentration in the stomata, reducing the photorespiration. Thus, the parameter  $f_d$  should be lower for this type of plant than for forest species. Using LAI to extrapolate  $f_d$  for the Amazon Basin resulted in  $f_d$  values ranging from 0.005 in the arc of deforestation to 0.015 in forested areas (Figure S6). The resulting  $f_d$  values are relatively small compared to references like: 0.019 for C4 grass (Harper et al., 2016), 0.0096 for maize (Williams et al., 2017) and 0.008 for maize (Leung et al., 2020). However, the same studies proposed reductions in the  $f_d$  values compared to the default ones, indicating that the calibration of this parameter still need improvements in different PFTs.

170

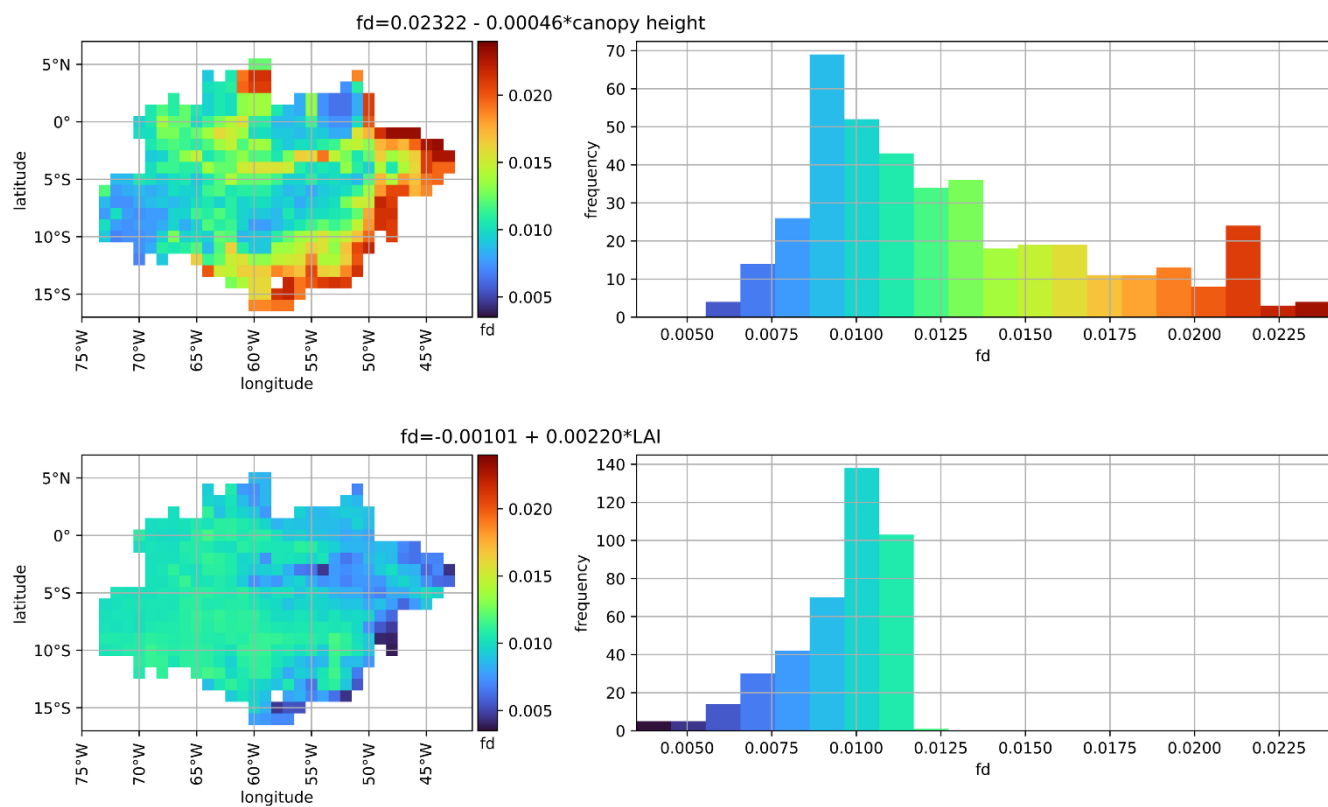

**Figure S3.5.1:  $fd$  spatialized for the Brazilian Amazon biome using two different methods, with canopy height and LAI.**

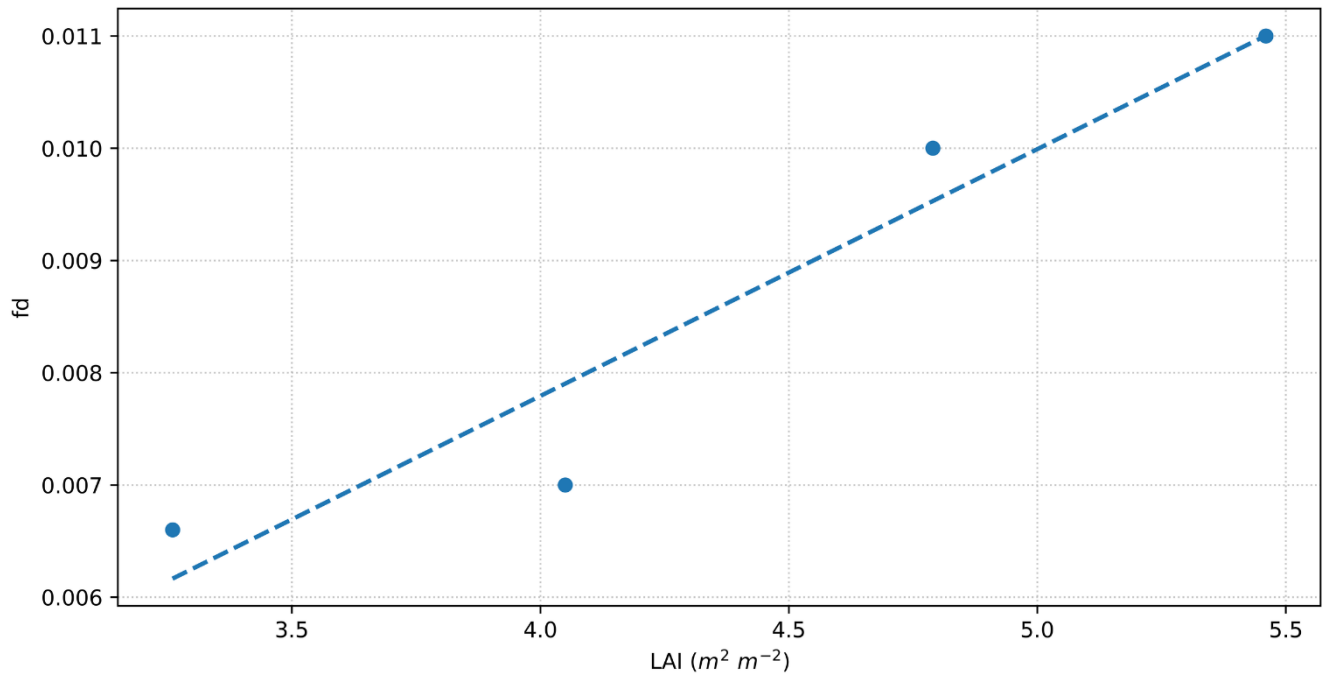

175

**Figure S3.5.2: Relationship between LAI and  $f_0$  for different sites of the Brazilian Amazon biome.**

**S.4. Calibration and evaluation of JULES**

180

**Table S4.1: Physiological limits for JULES most sensitivities parameters for tropical forests applied for Nelder Mead optimization**

| Parameter | Physiological limit | unit                                    | Minimum Reference  | Maximum Reference   |
|-----------|---------------------|-----------------------------------------|--------------------|---------------------|
| tupp_io   | 36 - 45             | Celsius degree                          | Clark et al., 2012 | Dreyer et al., 2001 |
| alpha_io  | 0.05 - 0.011        | mol CO <sub>2</sub> per mol PAR photons | Sklimmann 2008     | Sklimmann 2008      |
| fd_io     | 0.005 - 0.015       | dimensionless                           | Clark et al., 2011 | Harper et al., 2016 |
| f0_io     | 0.7 - 0.95          | dimensionless                           | Li et al., 2016    | Li et al., 2016     |

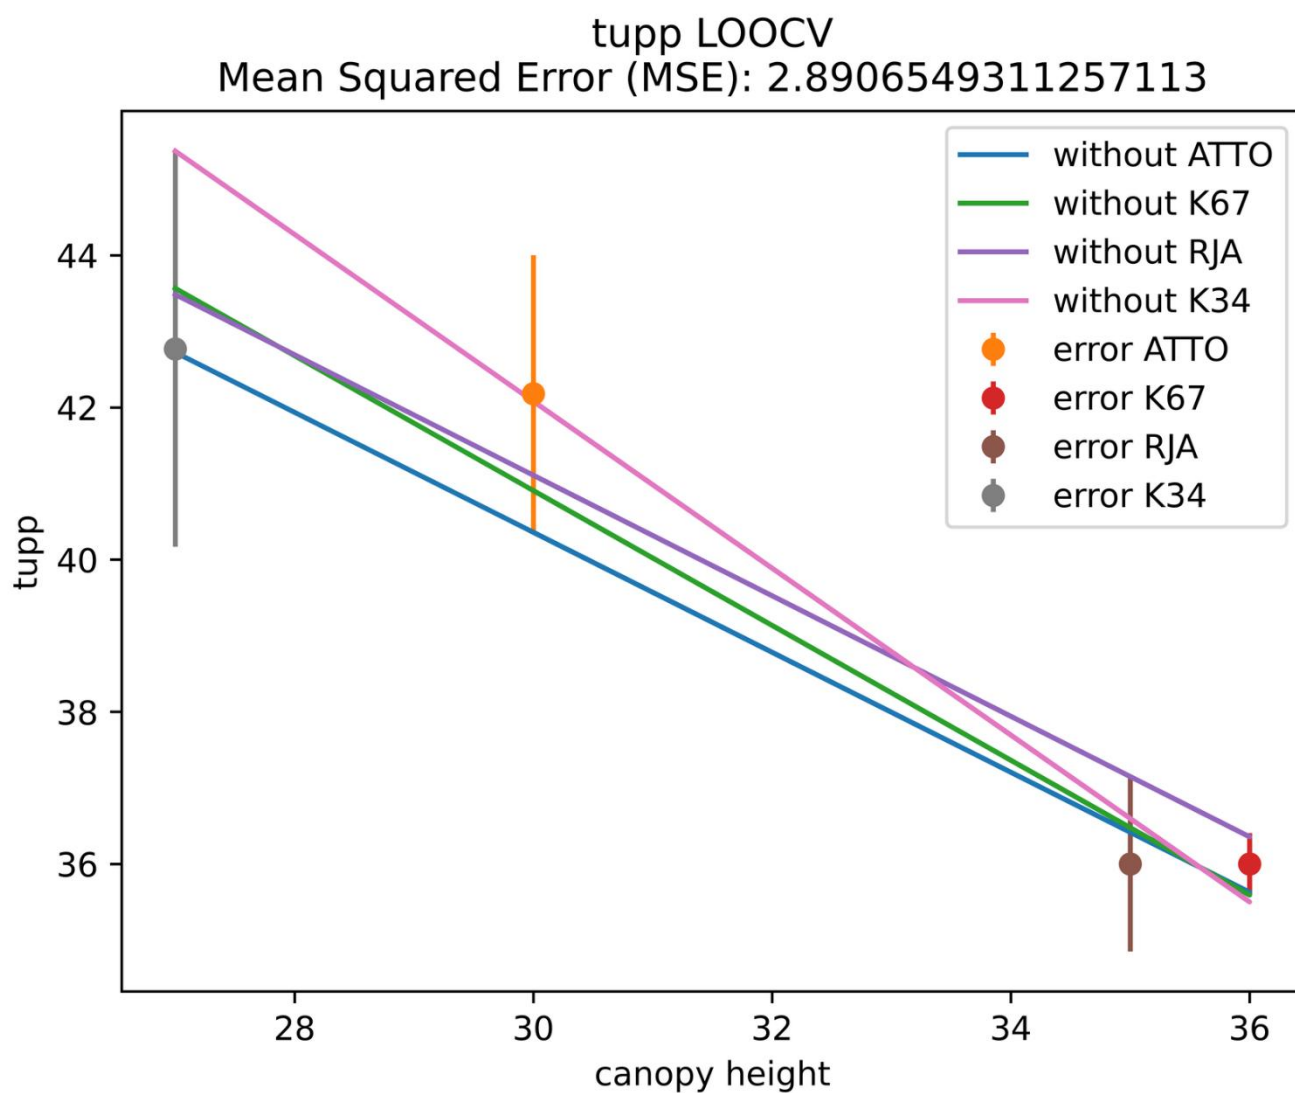

**Figure S4.1: Leave-one-out cross-validation (LOOCV) for Tupp in relation to canopy height for four different towers in the Brazilian Amazon biome**

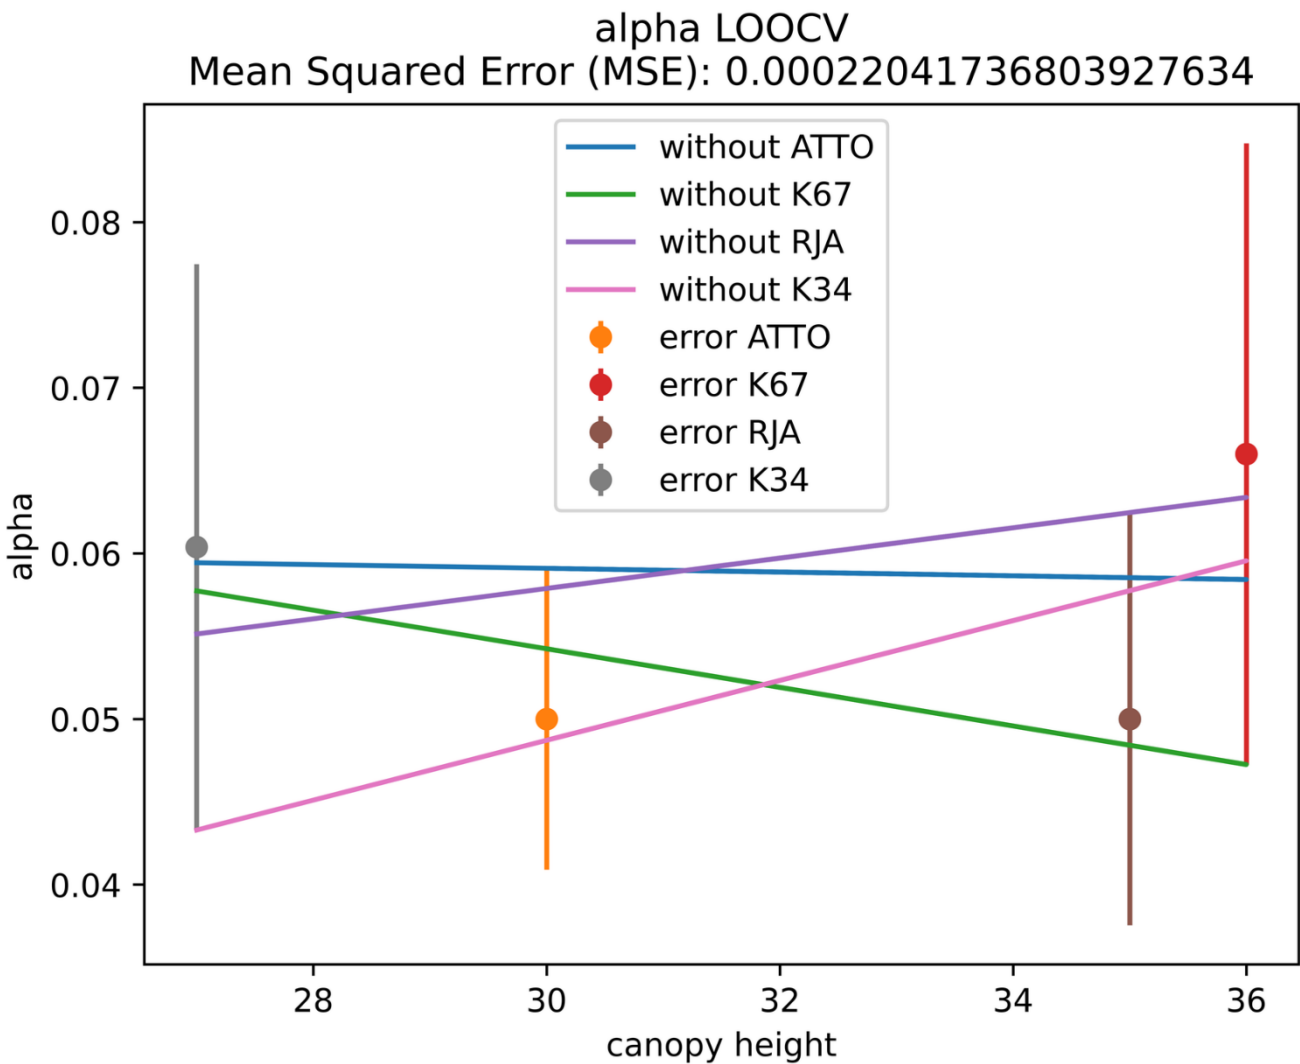

**Figure S4.2: Leave-one-out cross-validation (LOOCV) for alpha in relation to canopy height for four different towers in the Brazilian Amazon biome.**

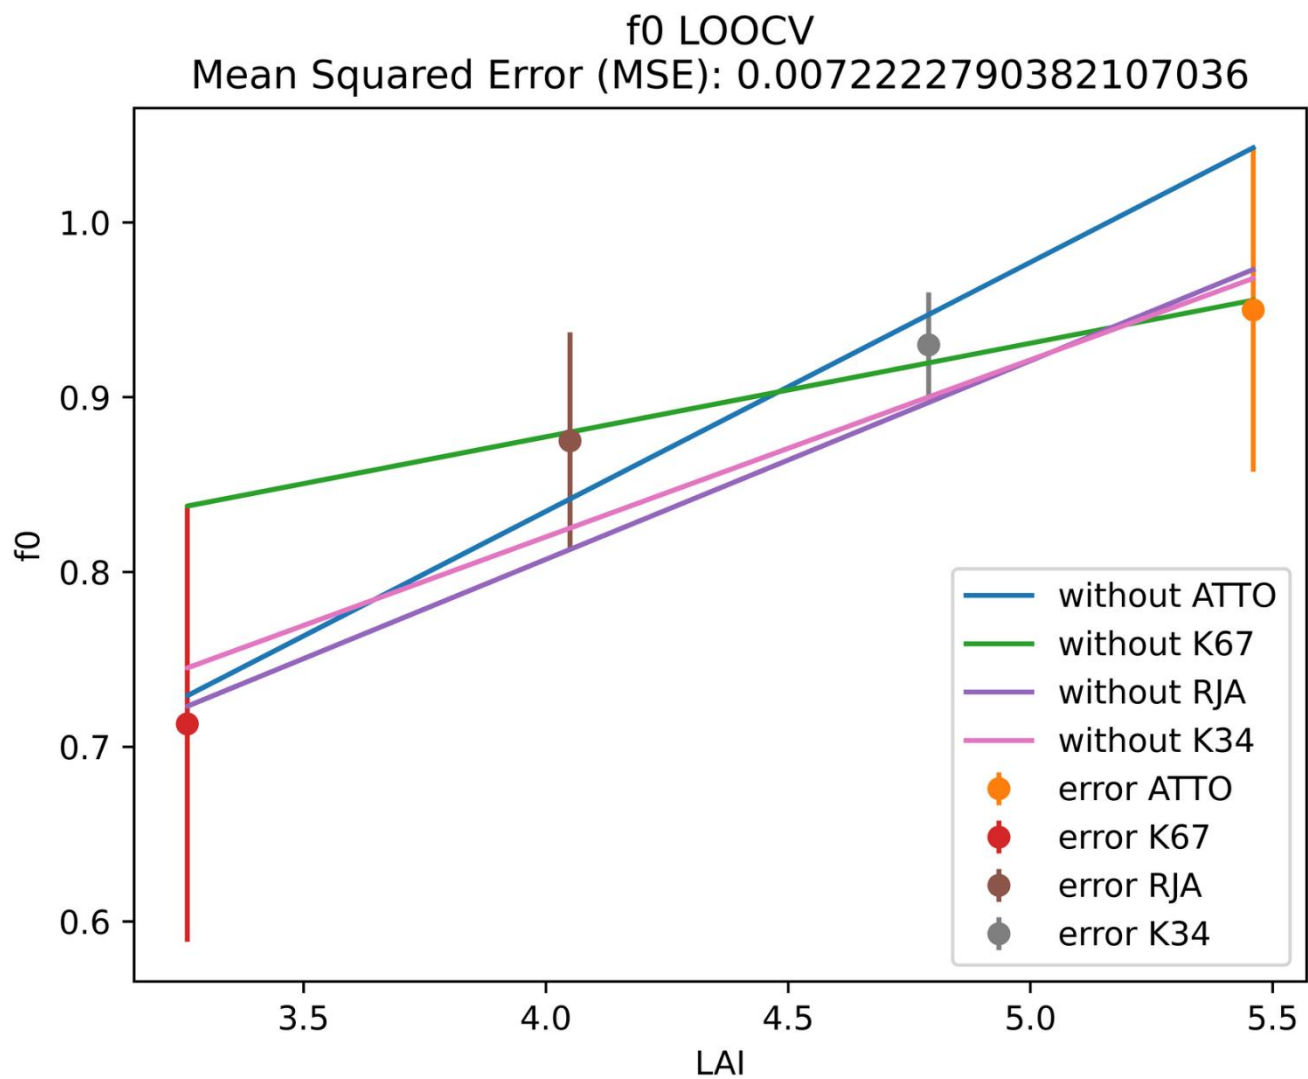

195 **Figure S4.3: Leave-one-out cross-validation for  $f_0$  in relation to LAI for four different towers in the Brazilian Amazon biome.**

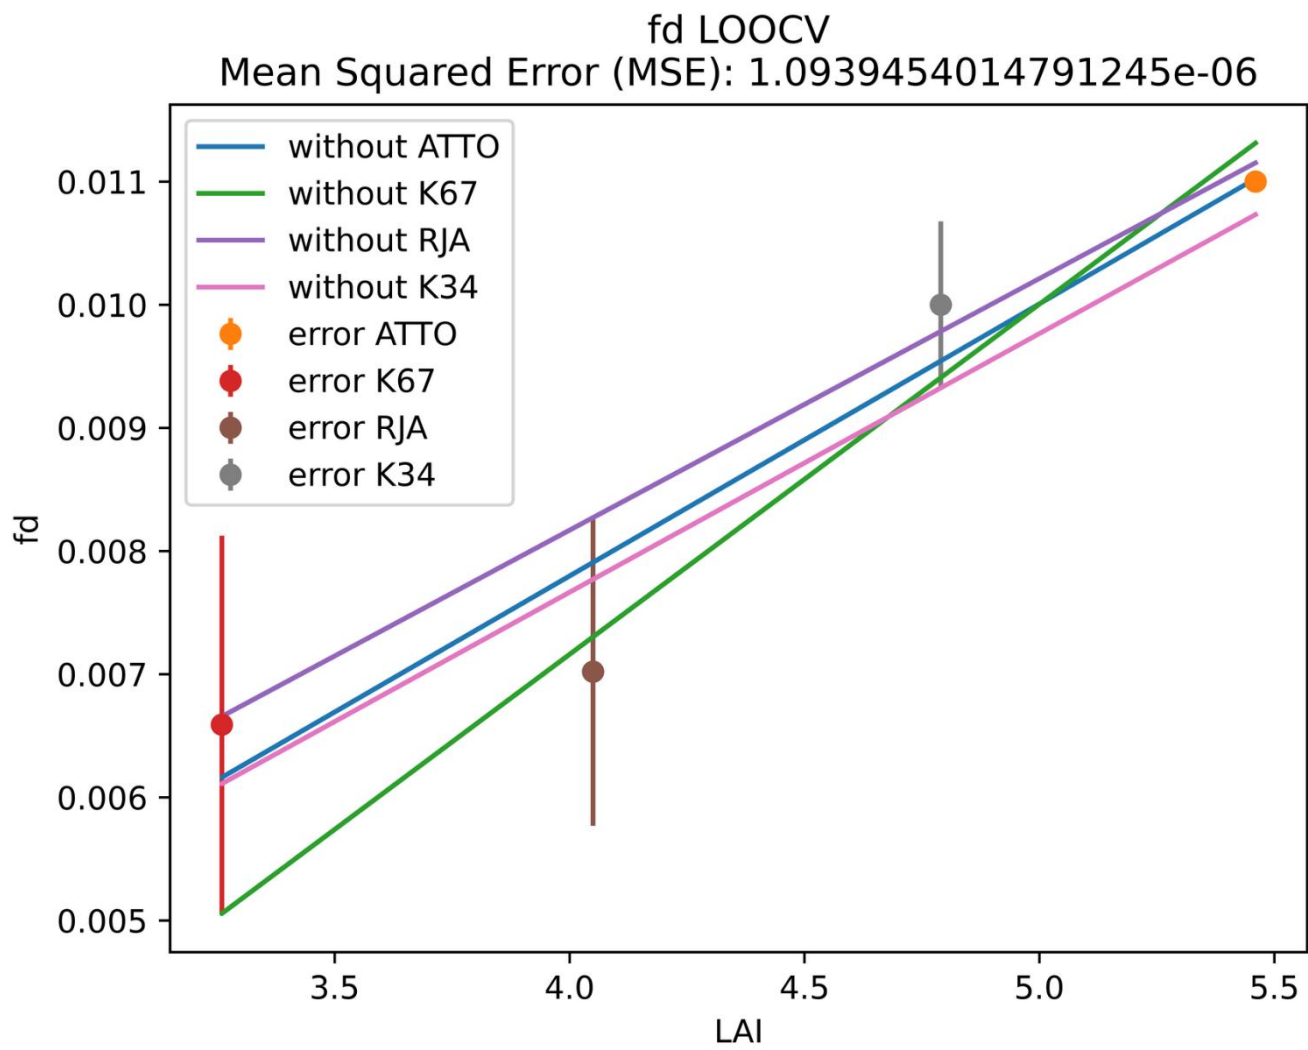

Figure S4.4: Leave-one-out cross-validation for fd in relation to LAI for four different towers in the Brazilian Amazon biome.

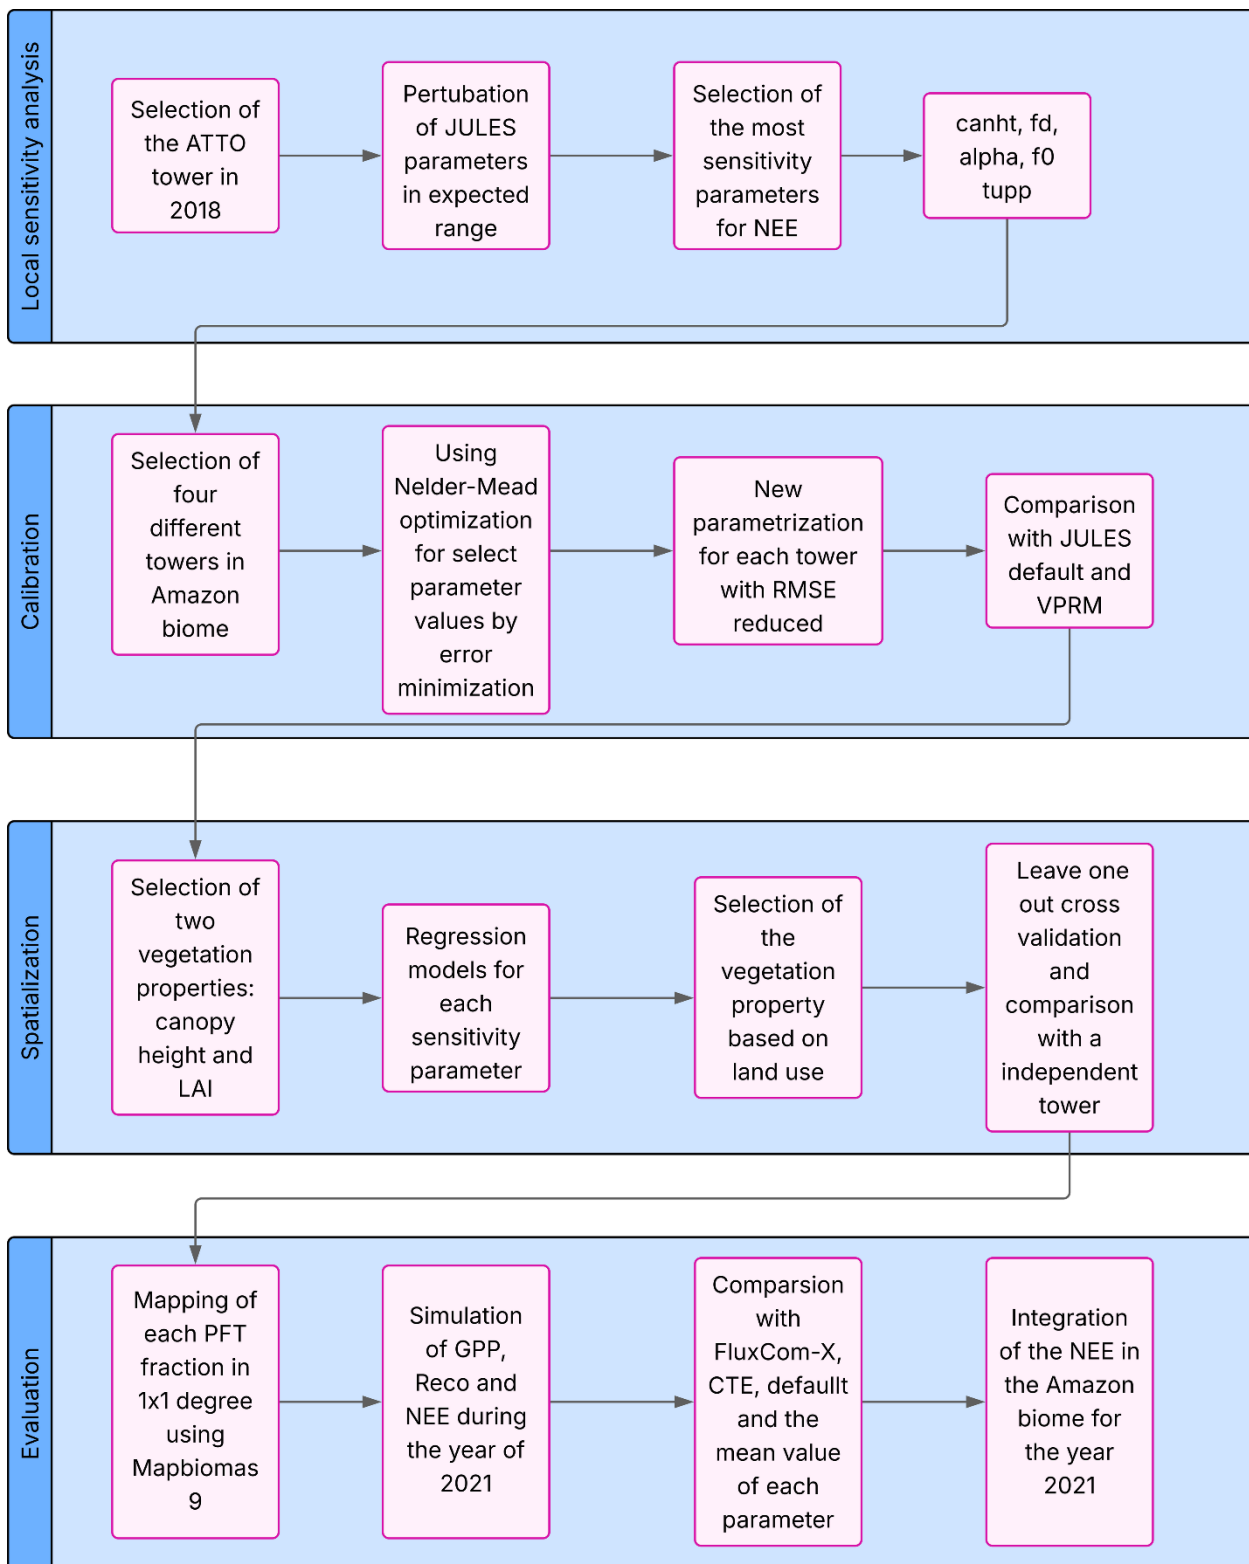

**Figure S.4.5: Flowchart describing the procedures utilized to spatialize JULES and to obtain the NEE in the Brazilian Amazon biome.**

205

### S.5 Comparison with JULES versions

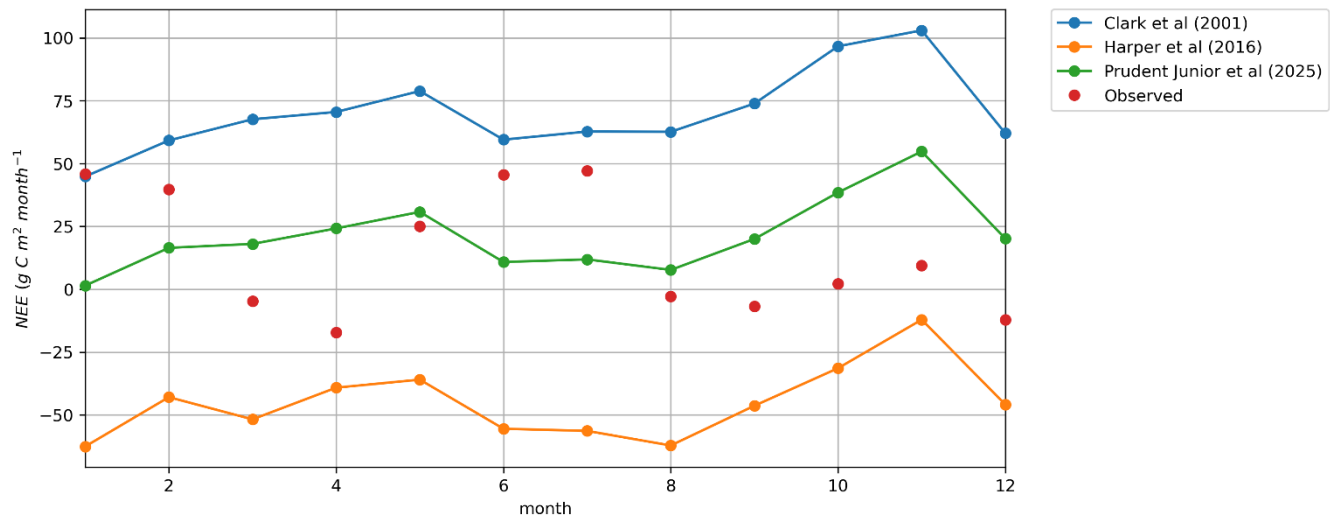

**Figure S5. Comparison of NEE simulated in different JULES versions in the ATTO tower during the year of 2018.**

210

### References

Clark, D. B., Mercado, L. M., Sitch, S., Jones, C. D., Gedney, N., Best, M. J., Pryor, M., Rooney, G. G., Essery, R. L. H., Blyth, E., Boucher, O., Harding, R. J., Huntingford, C., and Cox, P. M.: The Joint UK Land Environment Simulator (JULES), model description – Part 2: Carbon fluxes and vegetation dynamics, *Geosci. Model Dev.*, 4, 701–722, <https://doi.org/10.5194/gmd-4-701-2011>, 2011.

Collatz, G. J., Ball, J. T., Grivet, C., & Berry, J. A. (1991). Physiological and environmental regulation of stomatal conductance, photosynthesis and transpiration: a model that includes a laminar boundary layer. *Agricultural and Forest meteorology*, 54(2-4), 107-136. [https://doi.org/10.1016/0168-1923\(91\)90002-8](https://doi.org/10.1016/0168-1923(91)90002-8)

Collatz, G. J., Ribas-Carbo, M., and Berry, J. A.: Coupled photosynthesis-stomatal conductance model for leaves of C4 plants. *Functional Plant Biology*, 19(5), 519-538. <https://doi.org/10.1071/PP9920519>, 1992.

- Cox, P. M., Huntingford, C., and Harding, R. J.: A canopy conductance and photosynthesis model for use in a GCM land surface scheme. *Journal of Hydrology*, 212, 79-94. [https://doi.org/10.1016/S0022-1694\(98\)00203-0](https://doi.org/10.1016/S0022-1694(98)00203-0), 1998.
- 225 Dreyer, E., Le Roux, X., Montpied, P., Daudet, F. A., and Masson, F.: Temperature response of leaf photosynthetic capacity in seedlings from seven temperate tree species. *Tree physiology*, 21(4), 223-232, 2001.
- Harper, A. B., Cox, P. M., Friedlingstein, P., Wiltshire, A. J., Jones, C. D., Sitch, S., and Bodegom, P. V. .: Improved representation of plant functional types and physiology in the Joint UK Land Environment Simulator (JULES v4. 2) using plant trait information. *Geoscientific Model Development*, 9(7), 2415-2440. <https://doi.org/10.5194/gmd-9-2415-2016>, 2016.
- 230 Jacobs, C. M. J.: Direct impact of atmospheric CO<sub>2</sub> enrichment on regional transpiration, Ph.D. thesis, Wageningen Agricultural University, 1994.
- Lambers, H., Chapin III, F. S., and Pons, T. L.: *Plant physiological ecology*. Springer Science & Business Media. <https://doi.org/10.1007/978-0-387-78341-3>, 2008.
- 235 Leung, F., Williams, K., Sitch, S., Tai, A. P., Wiltshire, A., Gornall, J., and Scoby, D.: Calibrating soybean parameters in JULES5. 0 from the US-Ne2/3 FLUXNET sites and the SoyFACE-O 3 experiment. *Geoscientific Model Development Discussions*, 2020, 1-29.<https://doi.org/10.5194/gmd-13-6201-2020>, 2020.
- Li, J., Wang, Y. P., Duan, Q., Lu, X., Pak, B., Wiltshire, A., and Ziehn, T.: Quantification and attribution of errors in the simulated annual gross primary production and latent heat fluxes by two global land surface models. *Journal of Advances in Modeling Earth Systems*, 8(3), 1270-1288. <https://doi.org/10.1002/2015MS000583>, 2016.
- 240 Osborne, T., Gornall, J., Hooker, J., Williams, K., Wiltshire, A., Betts, R., & Wheeler, T.: JULES-crop: a parametrisation of crops in the Joint UK Land Environment Simulator. *Geoscientific Model Development Discussions*, 7(5), 6773-6809. <https://doi.org/10.5194/gmd-8-1139-2015>, 2015.
